# Supplementary material for: The effects of asking a fertility intention question in primary care settings: a systematic review protocol
Source: PubMed Central journal article supplement (PMC5248461; doi:10.1186/s13643-017-0412-z), 2017-01-19
Supplement: 13643_2017_412_MOESM3_ESM.pdf [file 13643_2017_412_MOESM3_ESM.pdf]

## PRISMA-P 2015 Checklist

This checklist has been adapted for use with protocol submissions to *Systematic Reviews* from Table 3 in Moher D et al: Preferred reporting items for systematic review and meta-analysis protocols (PRISMA-P) 2015 statement. *Systematic Reviews* 2015 4:1

| Section/topic                     | #  | Checklist item                                                                                                                                                                                  | Information reported |    | Line number(s)                   |
|-----------------------------------|----|-------------------------------------------------------------------------------------------------------------------------------------------------------------------------------------------------|----------------------|----|----------------------------------|
|                                   |    |                                                                                                                                                                                                 | Yes                  | No |                                  |
| <b>ADMINISTRATIVE INFORMATION</b> |    |                                                                                                                                                                                                 |                      |    |                                  |
| <b>Title</b>                      |    |                                                                                                                                                                                                 |                      |    |                                  |
| Identification                    | 1a | Identify the report as a protocol of a systematic review                                                                                                                                        | Yes                  |    | pg 1, line 6                     |
| Update                            | 1b | If the protocol is for an update of a previous systematic review, identify as such                                                                                                              |                      | No |                                  |
| <b>Registration</b>               | 2  | If registered, provide the name of the registry (e.g., PROSPERO) and registration number in the Abstract                                                                                        | Yes                  |    | pg 2, line 48                    |
| <b>Authors</b>                    |    |                                                                                                                                                                                                 |                      |    |                                  |
| Contact                           | 3a | Provide name, institutional affiliation, and e-mail address of all protocol authors; provide physical mailing address of corresponding author                                                   | Yes                  |    | pg 1, line 8-32                  |
| Contributions                     | 3b | Describe contributions of protocol authors and identify the guarantor of the review                                                                                                             | Yes                  |    | pg 8, line 58-60, pg 9 line 4-10 |
| <b>Amendments</b>                 | 4  | If the protocol represents an amendment of a previously completed or published protocol, identify as such and list changes; otherwise, state plan for documenting important protocol amendments |                      | No |                                  |
| <b>Support</b>                    |    |                                                                                                                                                                                                 |                      |    |                                  |
| Sources                           | 5a | Indicate sources of financial or other support for the review                                                                                                                                   | Yes                  |    | pg 9, line 15-19                 |
| Sponsor                           | 5b | Provide name for the review funder and/or sponsor                                                                                                                                               | NA                   |    | pg 9, line 22-24                 |

| Section/topic               | #   | Checklist item                                                                                                                                                                                                            | Information reported |    | Line number(s)                     |
|-----------------------------|-----|---------------------------------------------------------------------------------------------------------------------------------------------------------------------------------------------------------------------------|----------------------|----|------------------------------------|
|                             |     |                                                                                                                                                                                                                           | Yes                  | No |                                    |
| Role of sponsor/<br>funder  | 5c  | Describe roles of funder(s), sponsor(s), and/or institution(s), if any, in developing the protocol                                                                                                                        | NA                   |    |                                    |
| <b>INTRODUCTION</b>         |     |                                                                                                                                                                                                                           |                      |    |                                    |
| <b>Rationale</b>            | 6   | Describe the rationale for the review in the context of what is already known                                                                                                                                             | Yes                  |    | pg 3, line 7-49                    |
| <b>Objectives</b>           | 7   | Provide an explicit statement of the question(s) the review will address with reference to participants, interventions, comparators, and outcomes (PICO)                                                                  | Yes                  |    | pg 3, line 51-60                   |
| <b>METHODS</b>              |     |                                                                                                                                                                                                                           |                      |    |                                    |
| <b>Eligibility criteria</b> | 8   | Specify the study characteristics (e.g., PICO, study design, setting, time frame) and report characteristics (e.g., years considered, language, publication status) to be used as criteria for eligibility for the review | Yes                  |    | pg 4, line 20-57, pg 5, line 4-8   |
| <b>Information sources</b>  | 9   | Describe all intended information sources (e.g., electronic databases, contact with study authors, trial registers, or other grey literature sources) with planned dates of coverage                                      | Yes                  |    | pg 5, line 11-33                   |
| <b>Search strategy</b>      | 10  | Present draft of search strategy to be used for at least one electronic database, including planned limits, such that it could be repeated                                                                                | Yes                  |    | Additional File 1                  |
| <b>STUDY RECORDS</b>        |     |                                                                                                                                                                                                                           |                      |    |                                    |
| Data management             | 11a | Describe the mechanism(s) that will be used to manage records and data throughout the review                                                                                                                              | Yes                  |    | pg 6, line 4-20                    |
| Selection process           | 11b | State the process that will be used for selecting studies (e.g., two independent reviewers) through each phase of the review (i.e., screening, eligibility, and inclusion in meta-analysis)                               | Yes                  |    | pg 6, line 4-20                    |
| Data collection process     | 11c | Describe planned method of extracting data from reports (e.g., piloting forms, done independently, in duplicate), any processes for obtaining and confirming data from investigators                                      | Yes                  |    | pg 6, line 4-20, Additional File 2 |

| Section/topic                             | #   | Checklist item                                                                                                                                                                                                                              | Information reported |    | Line number(s)                   |
|-------------------------------------------|-----|---------------------------------------------------------------------------------------------------------------------------------------------------------------------------------------------------------------------------------------------|----------------------|----|----------------------------------|
|                                           |     |                                                                                                                                                                                                                                             | Yes                  | No |                                  |
| <b>Data items</b>                         | 12  | List and define all variables for which data will be sought (e.g., PICO items, funding sources), any pre-planned data assumptions and simplifications                                                                                       | Yes                  |    | pg 6, line 4-20                  |
| <b>Outcomes and prioritization</b>        | 13  | List and define all outcomes for which data will be sought, including prioritization of main and additional outcomes, with rationale                                                                                                        | Yes                  |    | pg 6, line 4-20                  |
| <b>Risk of bias in individual studies</b> | 14  | Describe anticipated methods for assessing risk of bias of individual studies, including whether this will be done at the outcome or study level, or both; state how this information will be used in data synthesis                        | Yes                  |    | pg 6, line 23-58, pg 7 line 4-18 |
| <b>DATA</b>                               |     |                                                                                                                                                                                                                                             |                      |    |                                  |
| <b>Synthesis</b>                          | 15a | Describe criteria under which study data will be quantitatively synthesized                                                                                                                                                                 | Yes                  |    | pg 7, line 33-54                 |
|                                           | 15b | If data are appropriate for quantitative synthesis, describe planned summary measures, methods of handling data, and methods of combining data from studies, including any planned exploration of consistency (e.g., $I^2$ , Kendall's tau) | Yes                  |    | pg 7, line 33-54                 |
|                                           | 15c | Describe any proposed additional analyses (e.g., sensitivity or subgroup analyses, meta-regression)                                                                                                                                         | NA                   |    |                                  |
|                                           | 15d | If quantitative synthesis is not appropriate, describe the type of summary planned                                                                                                                                                          | Yes                  |    | pg 7, line 33-54                 |
| <b>Meta-bias(es)</b>                      | 16  | Specify any planned assessment of meta-bias(es) (e.g., publication bias across studies, selective reporting within studies)                                                                                                                 | Yes                  |    | pg 7, line 59-60, pg 8, line 4-7 |
| <b>Confidence in cumulative evidence</b>  | 17  | Describe how the strength of the body of evidence will be assessed (e.g., GRADE)                                                                                                                                                            |                      | No |                                  |
